# Supplementary material
Source: PubMed Central journal article supplement (PMC2645837)
Supplement: M808103200_1.pdf [file M808103200_1.pdf]

**SUPPLEMENTAL MATERIALS**

**Oligos for RT-PCR**

| <u>Target</u>   | <u>Sequence</u>                                                     | <u>Prod. Size</u> | <u>Anneal</u> |
|-----------------|---------------------------------------------------------------------|-------------------|---------------|
| <i>Foxfl</i>    | 5-CCTTCACCAAAACAGTCACAACGG-3<br>5-TCACCTCACATCACACACGGCTTG-3        | 207 bp            | 57°C          |
| <i>Foxll</i>    | 5-TGCCGCATTCCACAGCATAGTC-3<br>5-CAAAGTGAGTTCCAGGACAGCCAG-3          | 128 bp            | 57°C          |
| <i>Vimentin</i> | 5-CTCTGCCTCTGCCAACCTTTTCTTCCC-3<br>5-CACCTGTCCATCTCTGGTCTCAACCGTC-3 | 128 bp            | 60°C          |
| <i>Gli1</i>     | 5-CGCCAAGCACCAGAATCGG-3<br>5-CCGAGACACAAGGTCCTTCATCC-3              | 416 bp            | 61°C          |
| <i>HPRT</i>     | 5-AGTCCCAGCGTCGTGATTAGC-3<br>5-ATAGCCCCCTTGAGCACACAG-3              | 204 bp            | 61°C          |

**Oligos for PCR of Genomic DNA  
(Restriction enzyme sites used for cloning are highlighted)**

| <u>Target</u>            | <u>Sequence</u>                                                               | <u>Prod. Size</u> | <u>Anneal</u> |
|--------------------------|-------------------------------------------------------------------------------|-------------------|---------------|
| <i>Foxfl</i> prom        | 5-CACAGTTACCTCATCGGGCAAGTG-3<br>5-ATGAAGCACTCGTTGAGCGACAGG-3                  | 4.08 Kb           | 55°C          |
| <i>Foxll</i> prom        | 5-CCACTTGGAGAGATGCCCTTTTAG-3<br>5-AAGCACTCGTTGAGCGACAGGTTG-3                  | 1.64 Kb           | 60°C          |
| <i>Foxll</i> prom nested | 5-CTGACTCCCGGGGACCAGCATGCAGGCTTTAC-3<br>5-TCACTGCCATGGACAGCAGCCTCTCCGCTCCAC-3 | 1.2 Kb            | 60°C          |
| CNS1                     | 5-AAGCCCTTTCAGTGTGGAATCCC-3<br>5-CCCTGGACATCTCCTTTGGACAAG-3                   | 994 bp            | 60°C          |
| CNS1 nested              | 5-TTTTTGCTAGCTCCGATTGTAGGCTGTTTGTAAC-3<br>5-TTTTTCCCGGGCGACAATCGGCAACCCC-3    | 180 bp            | 60°C          |

**Oligos for EMSA  
(Gli sites are underlined)**

| <u>Site</u>                    | <u>Sequence</u>                                                           | <u>Location</u>             |
|--------------------------------|---------------------------------------------------------------------------|-----------------------------|
| <i>Foxfl</i> -46.9<br>Gli site | 5-GGGGCCTCGCTGTGGGTGGTCTGGCGGCGCCC-3<br>5-GGGCGCCGCCGACCACCCACAGCGAGGCC-3 | -46.9 Kb from <i>Foxll</i>  |
| <i>Foxll</i> -186<br>Gli site  | 5-GGTGATTCAACTTGGGTGGGCGGACTTATCA-3<br>5-TGATAAGTCCGCCACCCAAGTTGAATCA-3   | -186 bp from <i>Foxll</i>   |
| <i>Foxll</i> -53<br>Gli site   | 5-GGTTAATTAATGTGGGTGGGCTGAGAACACA-3<br>5-TGTGTTCTCAGCCCACCCACATTAATTA-3   | -53 bp from <i>Foxll</i>    |
| <i>Ptch1</i><br>Gli site       | 5-GGGTTGCCTACCTGGGTGGTCTCTCCACTTT-3<br>5-AAAGTGGAGAGACCACCCAGGTAGGCAAC-3  | ~ -900 bp from <i>Ptch1</i> |
| <i>Ptch1</i><br>Gli site mut   | 5-GGGTTGCCTACCTGGGAAGTCTCTCCACTTT-3<br>5-AAAGTGGAGAGACTTCCCAGGTAGGCAAC-3  | ~ -900 bp from <i>Ptch1</i> |

**Oligos for Site-Directed Mutagenesis  
(Gli site mutations are highlighted)**

| <u>Site</u>                         | <u>Sequence</u>                                                     | <u>Anneal</u> | <u>Method</u>    |
|-------------------------------------|---------------------------------------------------------------------|---------------|------------------|
| <i>Foxfl</i> -46.9<br>Gli site (5') | 5-CTCTTCGCTATTACGCCAGCCCAAG-3<br>5-GGGCGCCCGCCGACTGGCCACAGCGAGGCC-3 | 62°C          | Overlap ext. PCR |
| <i>Foxfl</i> -                      | 5-GGCCTCGCTGTGGCCAGTCGGCGGCGCCC-3                                   | 62°C          | Overlap ext.     |

|                               |                                                                                                            |      |             |
|-------------------------------|------------------------------------------------------------------------------------------------------------|------|-------------|
| 46.9<br>Gli site<br>(3')      | 5-AACTAAAGCACCCACTTCTTACGGTTGTG-3                                                                          |      | PCR         |
| <i>Foxl1</i> -53<br>Gli site  | 5-<br>CAGCAATGAAATTTTAATTAATGTGGCCAGGCTGAGAACACAAGGAC<br>TG-3                                              | 55°C | Quickchange |
| <i>Foxl1</i> -122<br>Gli site | 5-<br>CAGTCCTTGTGTTCTCAGCCTGGCCACATTAATTAATAAATTCATTGCT<br>G-3                                             | 55°C | Quickchange |
| <i>Foxl1</i> -186<br>Gli site | 5-CCCCGAAACCGATTGGTTACCATCAAAAAGACACGTGGAGG-3<br>5-CCTCCACGTGTCTTTTTGATGGTAACCAATCGGTTTCGGGG-3             | 55°C | Quickchange |
| <i>Foxl1</i> -231<br>Gli site | 5-CACAGCTTGATTCAACTTGGCCAGGCGGACTTATCAACAGAC-3<br>5-GTCTGTTGATAAGTCCGCCTGGCCAAGTTGAATCAAGCTGTG-3           | 55°C | Quickchange |
| <i>Foxl1</i> -277<br>Gli site | 5-<br>CAGATCAGTGCGTTTATATATTGCACGCCCGGAAATTTTTCCAAATAA<br>AC-3                                             | 55°C | Quickchange |
| CNS1<br>Gli site              | 5-<br>GTTTATTTGGAAAAATTTCCGGGCGTGCAATATATAAACGCACTGATC<br>TG-3                                             | 55°C | Quickchange |
|                               | 5-GTGCTTACAGCGTCAAGGGCCAGACGTGGTATTTCAAACATCAG-3<br>5-CTGATGTTTGAAATACCACGTCTGGCCCTTGACGCTGTAAGCAC-3       | 55°C | Quickchange |
|                               | 5-CTTGAACAAAAATATACAGGGCTGGCTACTTCGCAGGGAAGATGG-<br>3<br>5-CCATCTTCCCTGCGAAGTAGCCAGCCCTGTATATTTTTGTTCAAG-3 | 55°C | Quickchange |

**Supplementary Table 1**
